# Supplementary material
Source: PubMed Central journal article supplement (PMC4856760)
Supplement: cr201627x1.pdf [file cr201627x1.pdf]

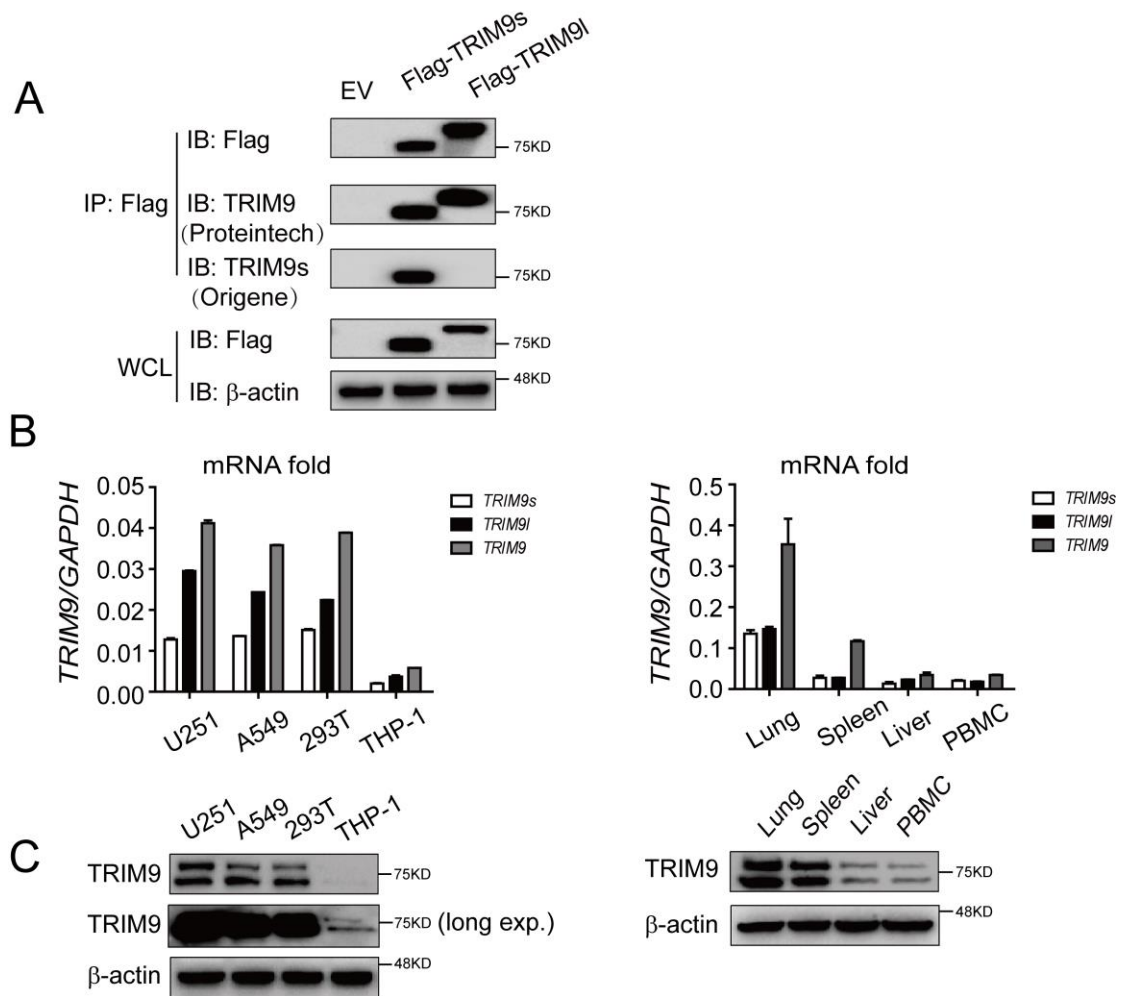

**Supplementary information, Figure S1** The expression of TRIM9 in human tissues and cell lines. (A) 293T cells were transfected with Flag-TRIM9s, Flag-TRIM9l or empty vector. Cell lysates were immunoprecipitated by anti-Flag beads and immunoblotted with anti-Flag, anti-TRIM9 (Proteintech) or anti-TRIM9s (OriGene). (B) q-PCR analysis of *TRIM9* expression in human tissues and cell lines using specific primers of *TRIM9*, *TRIM9s* and *TRIM9l*. (C) Immunoblot analysis to detect TRIM9 two isoforms using TRIM9 antibody (Proteintech) in human tissues and cell lines described as in B. Data are representative of three independent experiments (mean and s.d. in B).
