# Supplementary material
Source: PubMed Central journal article supplement (PMC4856760)
Supplement: cr201627x2.pdf [file cr201627x2.pdf]

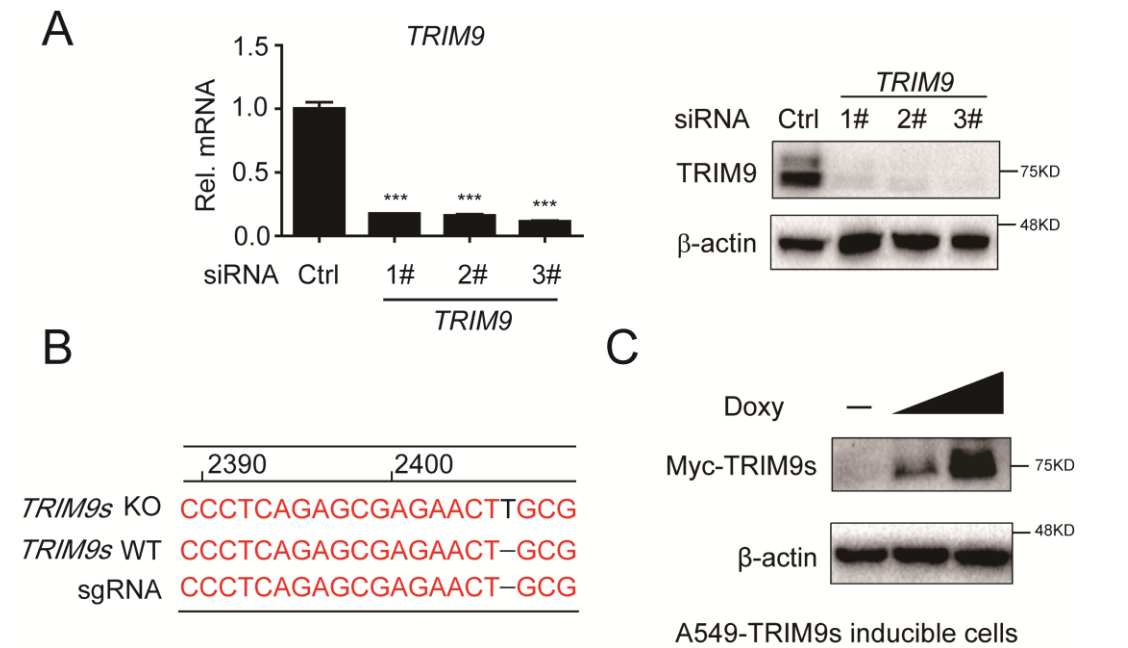

**Supplementary information, Figure S2** Knockdown, overexpression, or knockout of TRIM9s in A549 cells. (A) q-PCR and immunoblot analysis of the knockdown efficiency of siRNAs targeting *TRIM9* in A549 cells. Data are expressed relative to cells transfected with control (Ctrl) siRNA. (B) Sequence alignment analysis of the targeted DNAs in WT and *TRIM9s* KO A549 cells. (C) Induction of Myc-TRIM9s proteins by doxycycline (Doxy) in A549-TRIM9s inducible cells. \*\*\* $P < 0.001$ , versus the cells transfected with the Ctrl siRNA. (Student's t-test). Data are representative of three independent experiments (mean and s.d. in A).
