# Supplementary material
Source: PubMed Central journal article supplement (PMC4856760)
Supplement: cr201627x3.pdf [file cr201627x3.pdf]

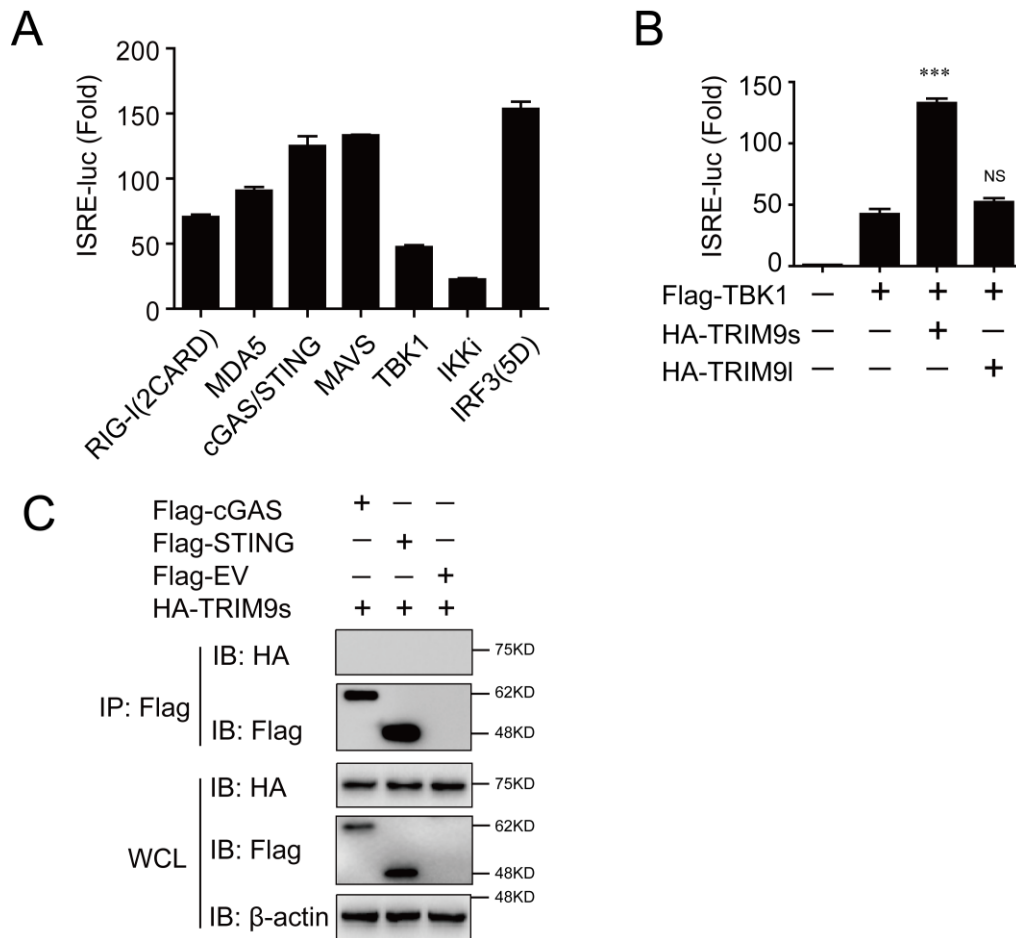

**Supplementary information, Figure S3** TRIM9s prompts type I IFN signaling through TBK1. (A) Activation of RIG-I(2CARD)-, MDA5-, cGAS/STING-, MAVS-, TBK1-, IKKi-, or IRF3 (5D)-mediated ISRE activity. (B) TRIM9s but not TRIM9I, induces TBK1-mediated ISRE activation. 293T cells were transfected with an ISRE luciferase reporter together with a vector encoding TBK1 along with empty vector or vectors encoding TRIM9s or TRIM9I. (C) TRIM9s does not interact with cGAS and STING. 293T cells were transfected with vectors encoding Flag-cGAS, Flag-STING, Flag-EV, and HA-TRIM9s. Cell lysates were immunoprecipitated by anti-Flag beads and immunoblotted with anti-HA. \*\*\*P < 0.001, versus the cells transfected with TBK1 alone. (Student's t-test). Data are representative of three independent experiments (mean and s.d. in A, B).
