# Supplementary material
Source: PubMed Central journal article supplement (PMC4856760)
Supplement: cr201627x4.pdf [file cr201627x4.pdf]

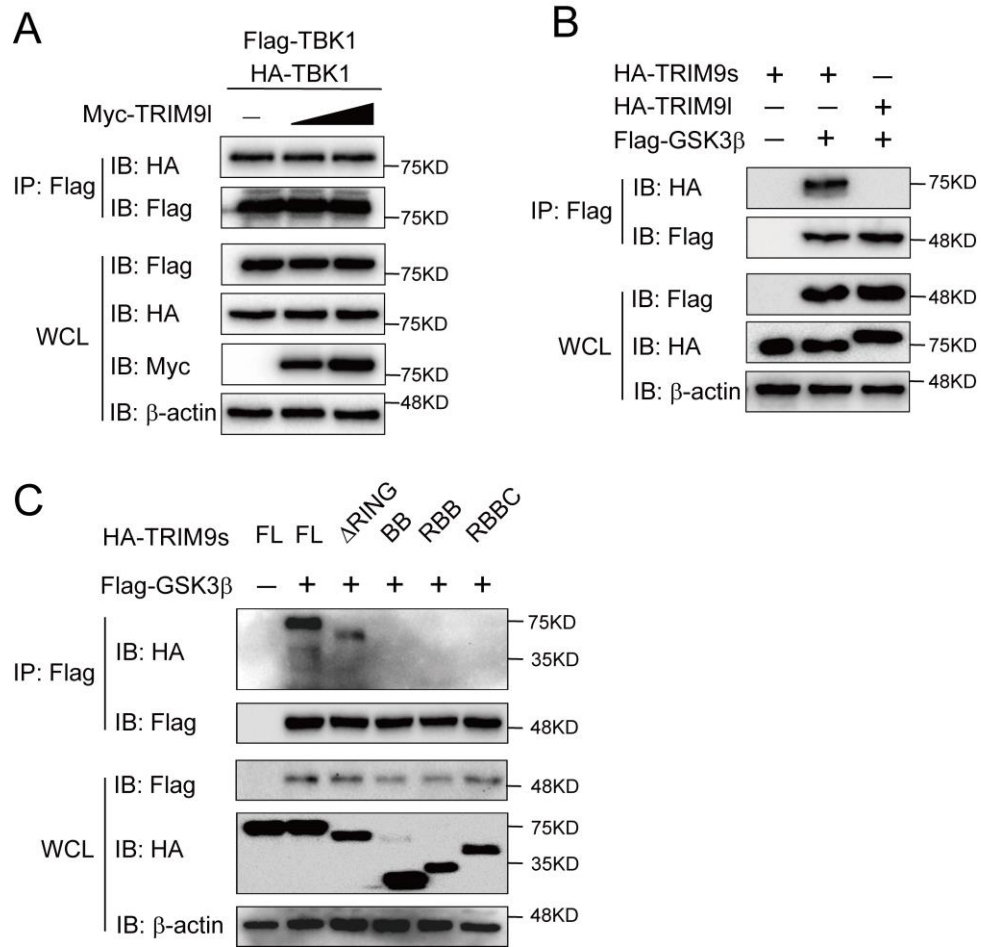

**Supplementary information, Figure S4** TRIM9I cannot enhance the oligomerization of TBK1 and associate with GSK3 $\beta$ , and C-terminal of TRIM9s is essential for binding GSK3 $\beta$ . (A) 293T cells were transfected with Flag-TBK1, HA-TBK1 along with empty vector (no wedge) or increasing amounts (wedge) of expression vector for TRIM9I for 24 hrs. Cell lysates were immunoprecipitated by anti-Flag beads and immunoblotted with anti-HA. (B) 293T cells were transfected with Flag-GSK3 $\beta$  together with HA-TRIM9s or HA-TRIM9I. Cell lysates were immunoprecipitated by anti-Flag beads and immunoblotted with anti-HA. (C) 293T cells were transfected with Flag-GSK3 $\beta$  and the deletion mutants of TRIM9s. Whole-cell extracts were immunoprecipitated with anti-Flag beads, and immunoblotted with anti-HA antibody. Data are representative of three independent experiments.
