# Supplementary material
Source: PubMed Central journal article supplement (PMC4856760)
Supplement: cr201627x5.pdf [file cr201627x5.pdf]

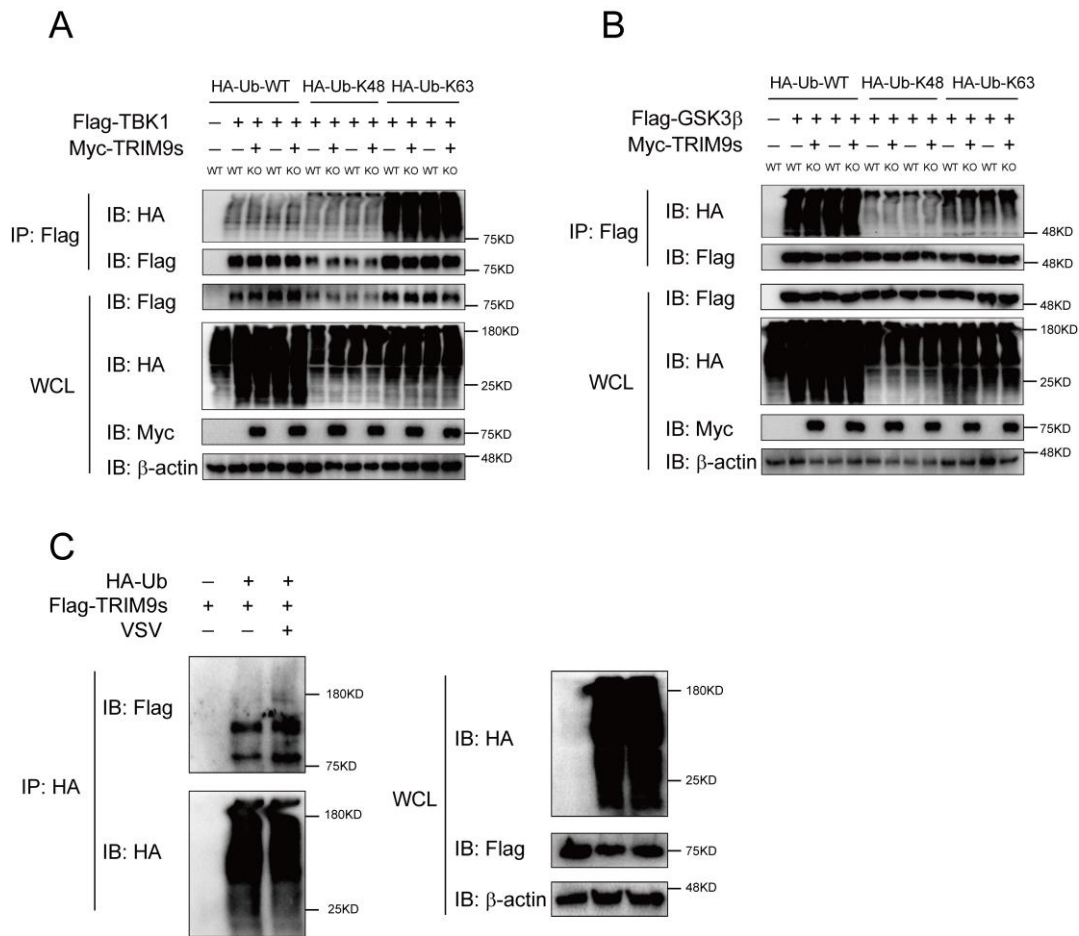

**Supplementary information, Figure S5** TRIM9s undergoes auto-regulated ubiquitination, but not affect the ubiquitination of TBK1 and GSK3β. (A-B) WT or TRIM9s KO 293T cells were transfected with Myc-TRIM9s, Flag-TBK1 (A), or Flag-GSK3β, HA-Ub (wild- type, WT) and its mutants, HA-tagged K63 only ubiquitin (HA-K63-Ub) or HA-tagged K48 only ubiquitin (HA-K48-Ub). Whole-cell extracts (add 1% SDS to exclude TBK1 or GSK3β associated proteins) were immunoprecipitated with anti-Flag beads and immunoblotted with anti-HA. (C) 293T cells were transfected with Flag-TRIM9s and HA-Ub, and then infected with VSV-eGFP for 10 hours. Lysates (add 1% SDS to exclude TRIM9s associated proteins) were immunoprecipitated with anti-HA beads and immunoblotted with anti-Flag. Data are representative of three independent experiments.
