# Supplementary material
Source: PubMed Central journal article supplement (PMC4856760)
Supplement: cr201627x6.pdf [file cr201627x6.pdf]

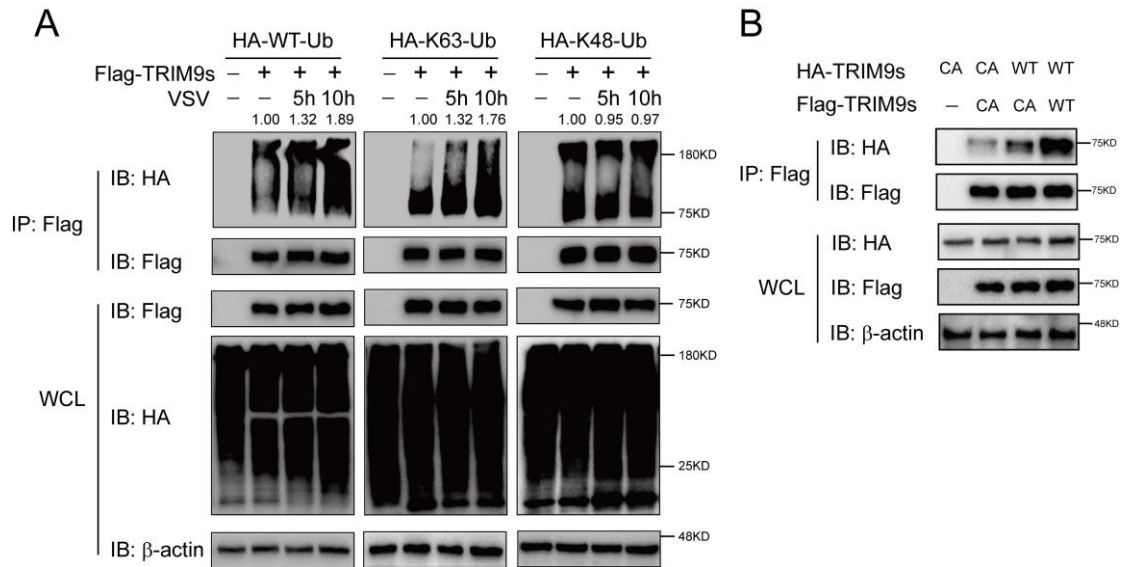

**Supplementary information, Figure S6** TRIM9s undergoes oligomerization and K63-linked ubiquitination after viral infection and the ubiquitination of TRIM9s can enhance auto-oligomerization. (A) 293T cells were transfected with Flag-TRIM9s and HA-tagged wild-type ubiquitin (HA-WT-Ub), HA-tagged K63 only ubiquitin (HA-K63-Ub), or HA-tagged K48 only ubiquitin (HA-K48-Ub) plasmids, and then infected with VSV-eGFP for the indicated time points. Lysates (add 1% SDS to exclude TRIM9s associated proteins) were immunoprecipitated with anti-Flag and immunoblotted with anti-HA. Densitometry analysis was performed for ubiquitination of TRIM9s. (B) 293T cells were transfected with HA-tagged or Flag-tagged TRIM9s-WT or CA mutant for 24hrs. Cell extracts were collected for immunoprecipitation with anti-Flag beads, followed by immunoblot with anti-HA antibody. Data are representative of three independent experiments.
